# Supplementary material
Source: HighWire-hosted journal article supplement (https://gut.bmj.com/content/71/6/1127)
Supplement: inline-supplementary-material-6 [file inline-supplementary-material-6.xlsx]

## Sheet: Sheet1
Supplementary Table S2: Differential expression analysis of genes identified by Tao and colleagues as differentially expressed in organoids cultured for 14 months.
Gene	P Value	Log2FoldChange
Foxa1	0.00265407	0.736107
Chga	0.00273719	0.820716
Neurog3	0.0132884	1.31835
Lyz1	0.0221102	1.14863
Muc2	0.0333898	0.647572
Hes1	0.0360855	0.45545
Lgr5	0.0657595	0.860271
Foxa2	0.110261	0.5621
Cdx1	0.111161	0.416741
Gfi1	0.115431	0.48362
Krt20	0.177226	-0.593083
Gata6	0.63359	-0.151868
Atoh1	0.635153	-0.146548
Elf3	0.897407	0.0240879
Cdx2	0.913185	-0.0260483
Hnf4a	0.964792	0.0119636
